# Supplementary material for: Fully automatic algorithm for detecting and tracking anatomical shoulder landmarks on fluoroscopy images with artificial intelligence
Source: PubMed Central journal article supplement (PMC10791975; doi:10.1007/s00330-023-10082-8), 2023-08-11
Supplement: 330_2023_10082_MOESM1_ESM.pdf [file 330_2023_10082_MOESM1_ESM.pdf]

**Table S1.** Comparison of x-and y- landmark coordinates between ground-truth and artificial intelligence of the training set. Shown are mean differences with the limits of agreements, and the intraclass correlation coefficients with 95% confidence interval.

| Landmarks                          |       | Mean difference (mm)<br>[limits of agreement] |                       | Intraclass correlation coefficients<br>[95% confidence interval] |                          |
|------------------------------------|-------|-----------------------------------------------|-----------------------|------------------------------------------------------------------|--------------------------|
|                                    |       | x-axis                                        | y-axis                | x-axis                                                           | y-axis                   |
| Superior edge of glenoid           |       |                                               |                       |                                                                  |                          |
|                                    | All   | 0.0<br>[-1.4 – 1.4]                           | 0.1<br>[-2.6 – 2.6]   | 0.998<br>[0.997 – 0.998]                                         | 0.997<br>[0.997 – 0.997] |
|                                    | 3 Hz  | -0.1<br>[-1.6 – 1.4]                          | -0.2<br>[-2.8 – 2.4]  | 0.998<br>[0.997 – 0.998]                                         | 0.995<br>[0.995 – 0.996] |
|                                    | 10 Hz | 0.1<br>[-1.2 – 1.4]                           | 0.2<br>[-2.5 – 2.9]   | 0.997<br>[0.997 – 0.997]                                         | 0.998<br>[0.997 – 0.998] |
| Inferior edge of glenoid           |       |                                               |                       |                                                                  |                          |
|                                    | All   | -0.0<br>[-2.7 – 2.6]                          | -0.1<br>[-2.3 – 2.1]  | 0.991<br>[0.99 – 0.992]                                          | 0.998<br>[0.998 – 0.998] |
|                                    | 3 Hz  | -0.3<br>[-4.0 – 3.5]                          | 0.2<br>[-2.4 – 2.7]   | 0.984<br>[0.982 – 0.986]                                         | 0.996<br>[0.995 – 0.996] |
|                                    | 10 Hz | 0.0<br>[-1.8 – 1.8]                           | -0.2<br>[-2.1 – 1.6]  | 0.995<br>[0.995 – 0.996]                                         | 0.999<br>[0.999 – 0.999] |
| Most lateral point of the acromion |       |                                               |                       |                                                                  |                          |
|                                    | All   | 0.0<br>[-1.4 – 1.3]                           | 0.3<br>[-2.6 – 3.1]   | 0.998<br>[0.997 – 0.998]                                         | 0.997<br>[0.996 – 0.997] |
|                                    | 3 Hz  | -0.1<br>[-2.0 – 1.7]                          | 0.6<br>[-4.0 – 2.9]   | 0.997<br>[0.997 – 0.997]                                         | 0.989<br>[0.985 – 0.992] |
|                                    | 10 Hz | 0.0<br>[-1.0 – 1.1]                           | 0.8<br>[-1.1 – 2.7]   | 0.998<br>[0.998 – 0.998]                                         | 0.998<br>[0.992 – 0.999] |
| Glenohumeral joint centre          |       |                                               |                       |                                                                  |                          |
|                                    | All   | -0.1<br>[-1.8 – 1.5]                          | -0.1<br>[-1.8 – 1.6]  | 0.996<br>[0.996 – 0.996]                                         | 0.999<br>[0.999 – 0.999] |
|                                    | 3 Hz  | 0.0<br>[-1.5 – 1.4]                           | 0.1<br>[-1.5 – 1.6]   | 0.998<br>[0.997 – 0.998]                                         | 0.998<br>[0.998 – 0.999] |
|                                    | 10 Hz | -0.2<br>[-1.9 – 1.6]                          | -0.2<br>[-1.9 – 1.5]  | 0.995<br>[0.9964 – 0.995]                                        | 0.999<br>[0.999 – 0.999] |
| Humeral shaft midpoint             |       |                                               |                       |                                                                  |                          |
|                                    | All   | 0.6<br>[-6.5 – 7.7]                           | 1.8<br>[-19.0 – 22.5] | 0.964<br>[0.961 – 0.967]                                         | 0.727<br>[0.707 – 0.745] |
|                                    | 3 Hz  | -0.8<br>[-6.1 – 4.5]                          | 3.1<br>[-18.3 – 12.1] | 0.970<br>[0.962 – 0.976]                                         | 0.675<br>[0.571 – 0.748] |
|                                    | 10 Hz | 1.4<br>[-6.1 – 8.9]                           | 4.4<br>[-17.1 – 25.9] | 0.959<br>[0.944 – 0.969]                                         | 0.729<br>[0.635 – 0.793] |
| Reference sphere                   |       |                                               |                       |                                                                  |                          |
|                                    | All   | 0.0<br>[-0.2 – 0.2]                           | 0.0<br>[-0.1 – 0.2]   | 1.000<br>[1.000 – 1.000]                                         | 1.000<br>[1.000 – 1.000] |
|                                    | 3 Hz  | 0.0<br>[-0.3 – 0.3]                           | 0.0<br>[-0.2 – 0.2]   | 1.000<br>[1.000 – 1.000]                                         | 1.000<br>[1.000 – 1.000] |
|                                    | 10 Hz | 0.0<br>[-0.2 – 0.2]                           | 0.0<br>[-0.1 – 0.1]   | 1.000<br>[1.000 – 1.000]                                         | 1.000<br>[1.000 – 1.000] |

**Table S2.** Comparison of 3D vs. 2D networks. Shown are the Dice coefficients for the landmarks of the training set.

| Landmarks                      | Dice coefficients |                   |
|--------------------------------|-------------------|-------------------|
|                                | Mean              |                   |
|                                | <i>3D network</i> | <i>2D network</i> |
| Reference sphere               | 0.98              | 0.96              |
| Glenohumeral joint centre      | 0.96              | 0.96              |
| Humeral shaft midpoint         | 0.58              | 0.54              |
| Superior edge of glenoid       | 0.72              | 0.67              |
| Inferior edge of glenoid       | 0.67              | 0.65              |
| Most lateral point of acromion | 0.66              | 0.65              |
| Mean $\pm$ standard deviation  | 0.76 $\pm$ 0.17   | 0.74 $\pm$ 0.18   |
